# Supplementary material for: Solderable and electroplatable flexible electronic circuit on a porous stretchable elastomer
Source: Springer Nature journal article supplement (doi:10.1038/ncomms1980), 2012-07-31
Supplement: 41467_2012_BFncomms1980_MOESM1000_ESM.pdf [file 41467_2012_BFncomms1980_MOESM1000_ESM.pdf]

Supplementary Figures

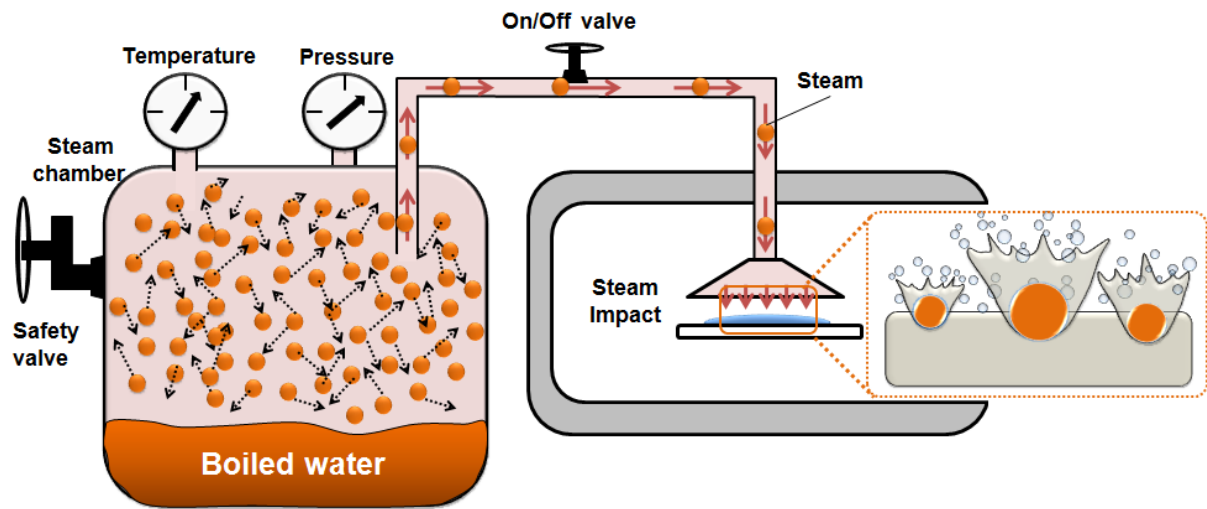

Supplementary Figure S1 **Steam etching process used to create porous structures.** Hot vapor was applied to the PDMS prepolymer surface, and the porous structures polymerized immediately under the hot vapor without the need for an extra thermal curing process.

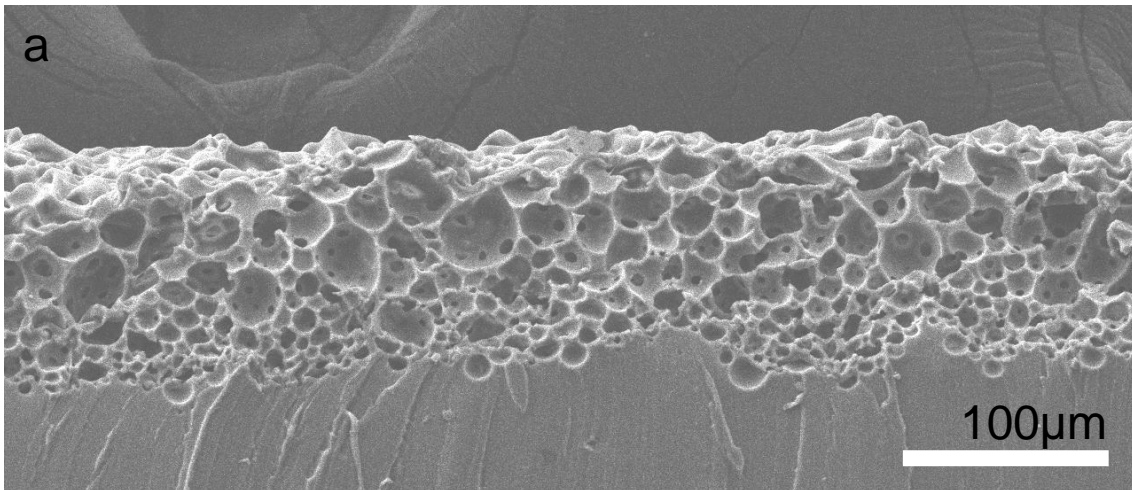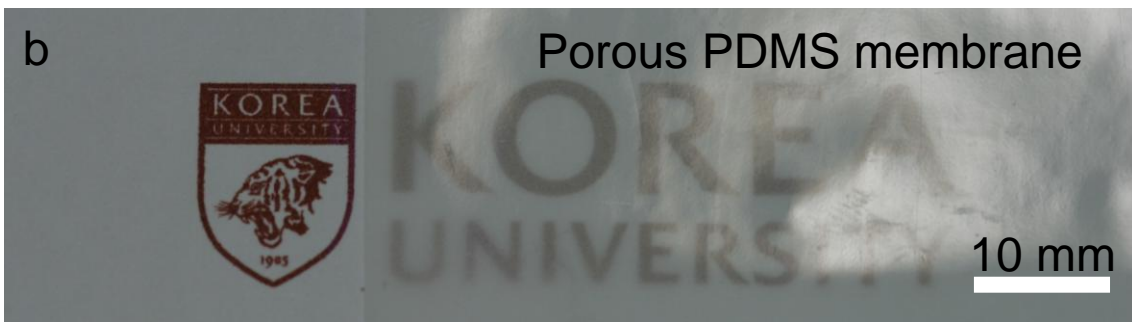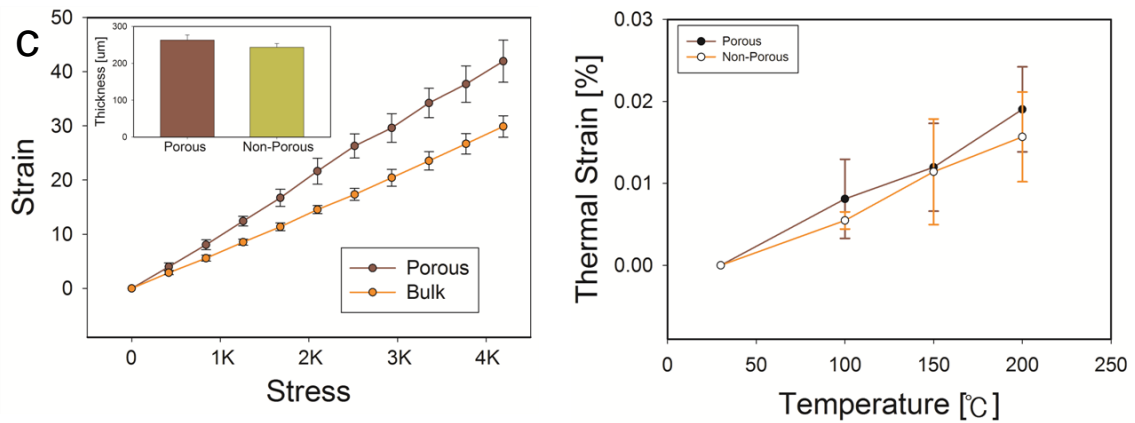

Supplementary Figure S2 **Characteristics of Porous PDMS thin membrane.** (a) Deep porous PDMS surface. The depth could be regulated by the steam pressure and changes in the viscoelastic properties of the prepolymer PDMS. (b) Semi-transparent characteristics of the porous structure. (c) Comparison of mechanical property of the porous and bulk PDMS (elongation and thermal expansion).

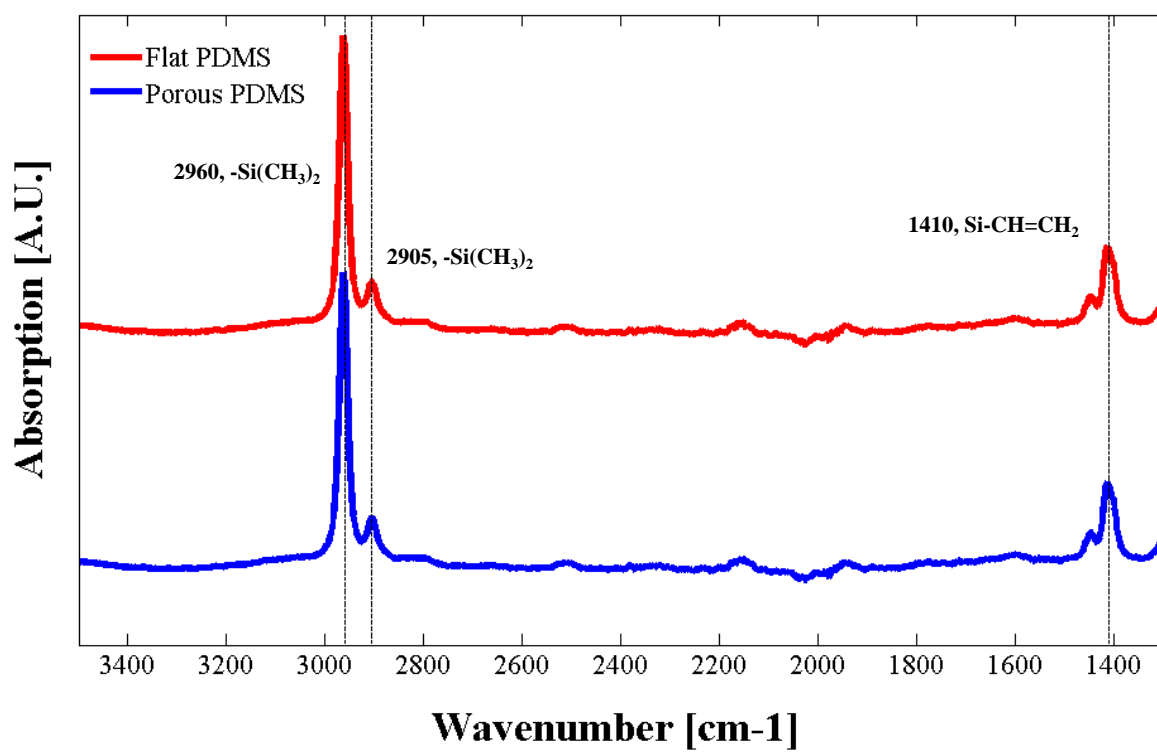

Supplementary Figure S3 FTIR spectrum of a normal PDMS sample (cured on a hot plate for 2 hours) and a steam-etched PDMS sample. No significant differences were observed.

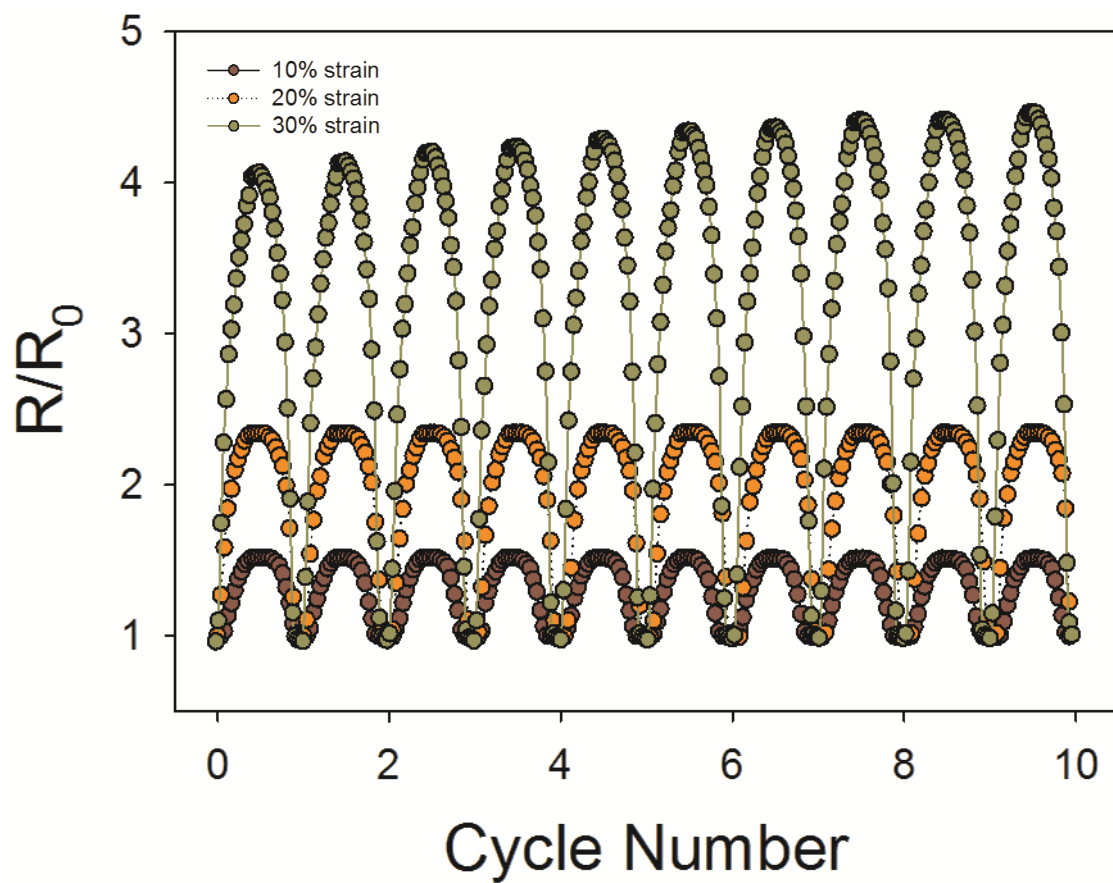

Supplementary Figure S4 **Resistance changes during the cycling tests.** The data supports the hysteresis measurements shown in Fig 2a.

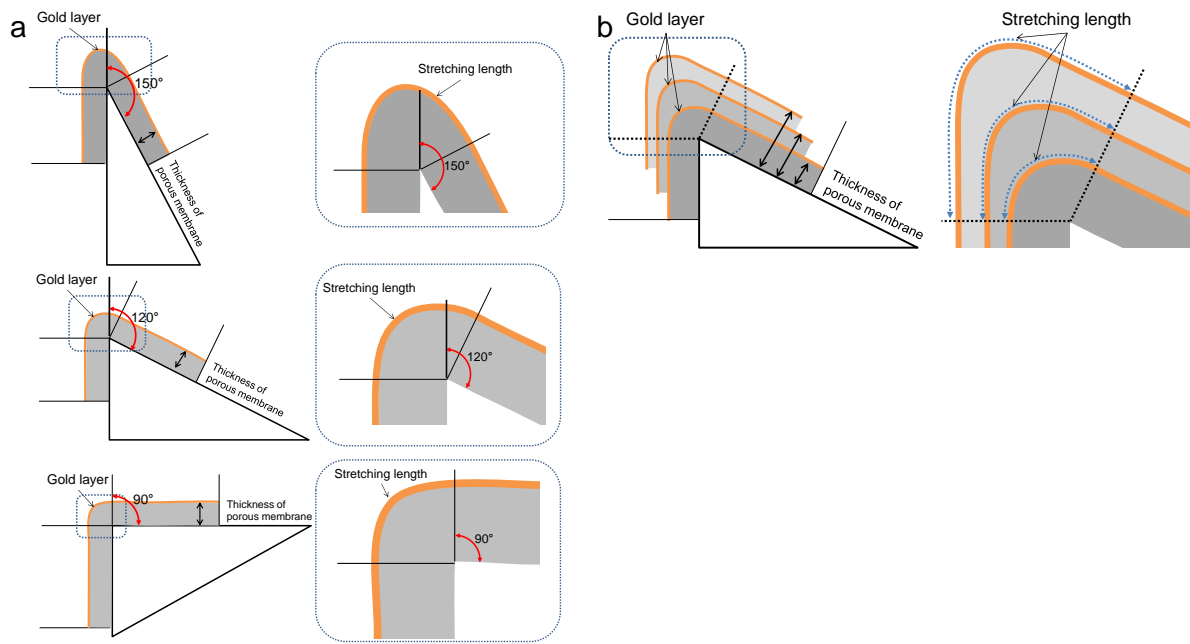

Supplementary Figure S5 **Bending motion of stretchable electrodes.** The higher stretching change based on (a) the angle and (b) thickness.

Initial

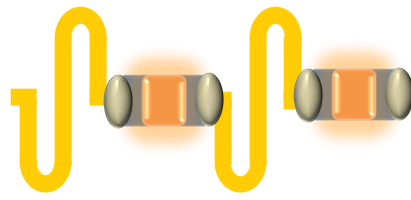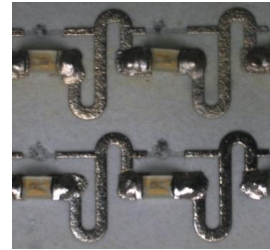

10% stretching

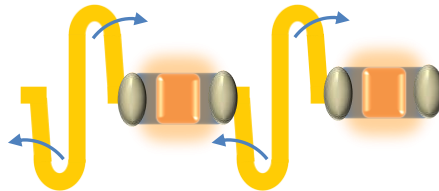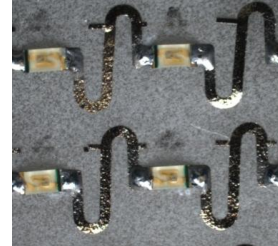

20% stretching

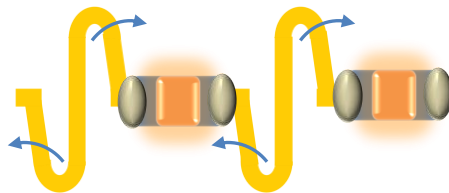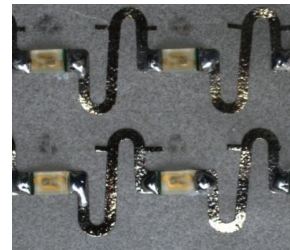

30% stretching

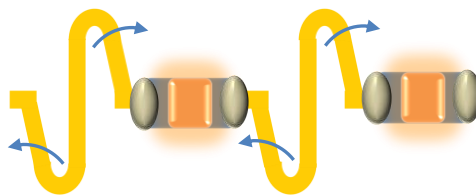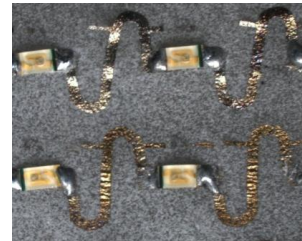

Supplementary Figure S6 **Schematic diagram and photograph of a deformed line pattern under stretching.**

Although the line and soldered regions deformed under stretching, the electronic circuit functioned well.

a

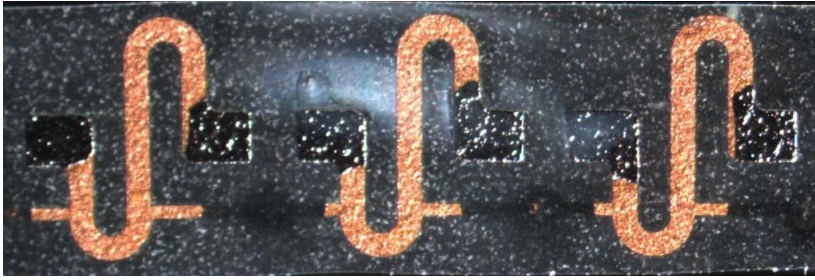

b

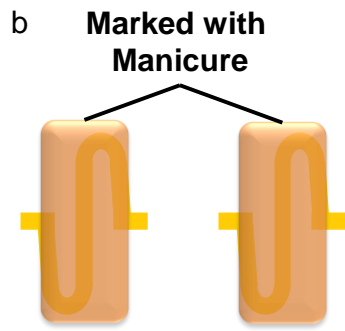

Supplementary Figure S7 **Selective electroplating.** (a) A picture of selectively electroplated circuit. (b) For selective electroplating, the meandering lines were partially marked with manicure.

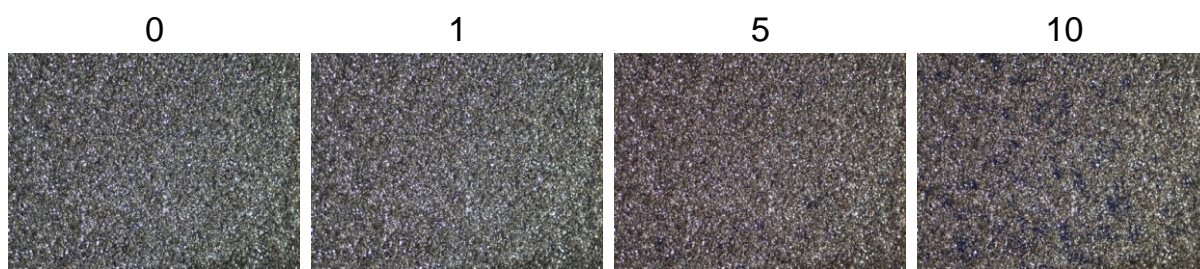

Supplementary Figure S8 **Tape test results from a Pt electroplated electrode.** The pictures were taken at 0, 1, 5, 10 tape test cycles. No significant changes in the sample surface were observed.



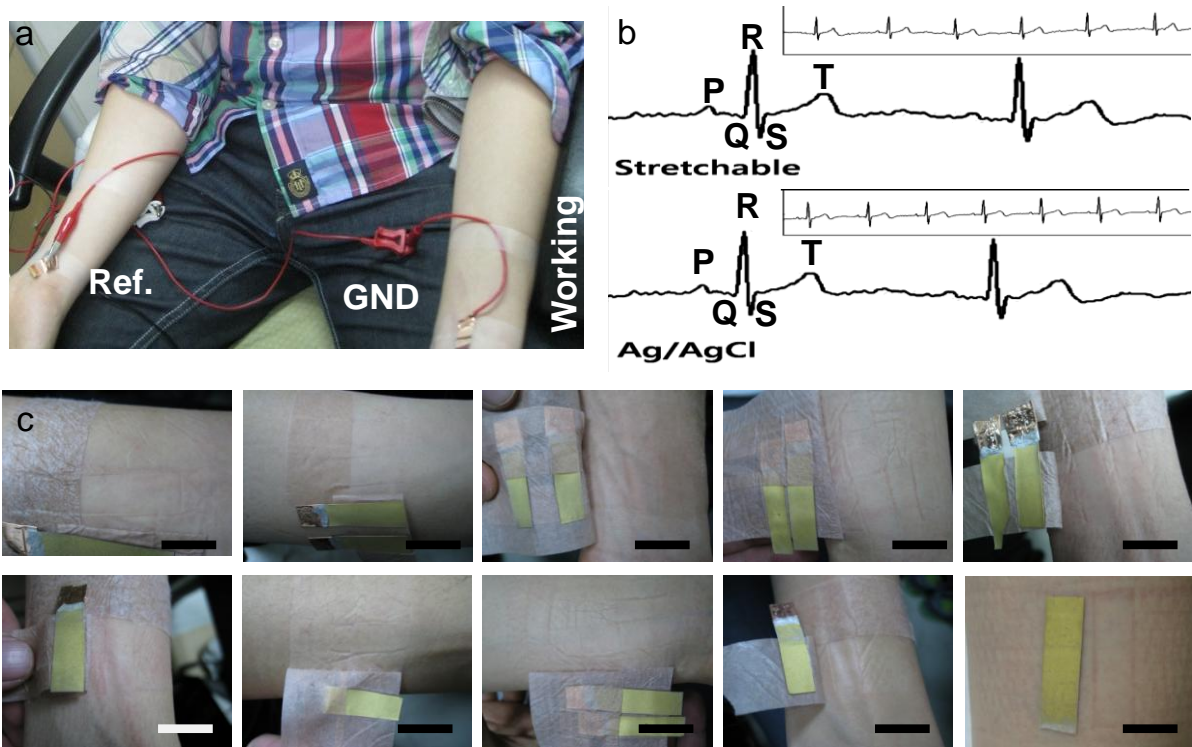

Supplementary Figure S9 **Biosignal monitoring**. (a) ECG recording experiments. The electrodes closely contacted the curvature of the skin. (b) A comparison of the ECG signals (PQRST) with those measured using a commercial Ag/AgCl electrode. The measured signals were similar. (c) After 1 week of continuous wearing, the electrode did not produce skin irritation or other problems for 10 recipients. Scale bar, 2 cm (c).

## Porous (long term)

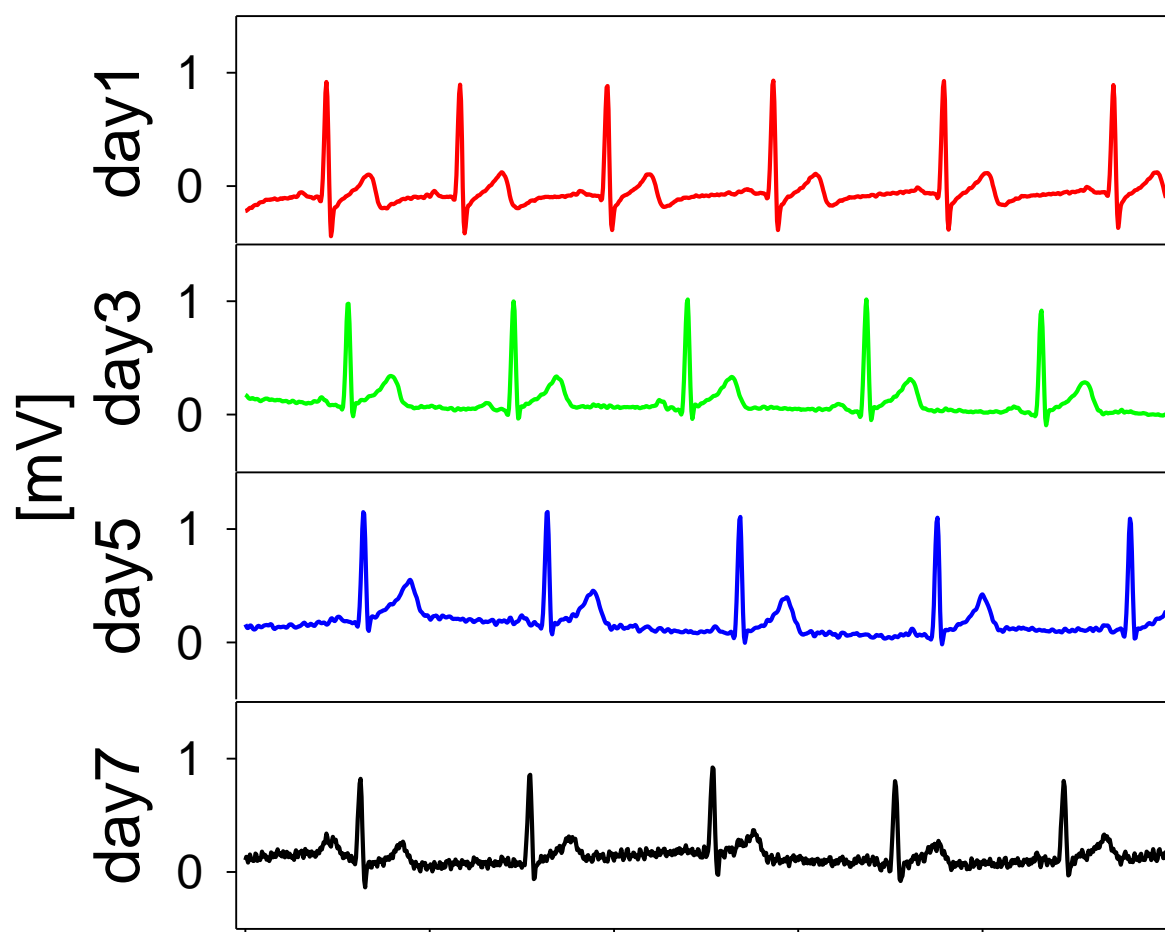

Supplementary Figure S10 ECG signals measured at days 1, 3, 5, and 7. No changes were observed during the first 5 days; however, at day 7, the baseline noise increased slightly and the amplitude of the R wave decreased by approximately 30%.

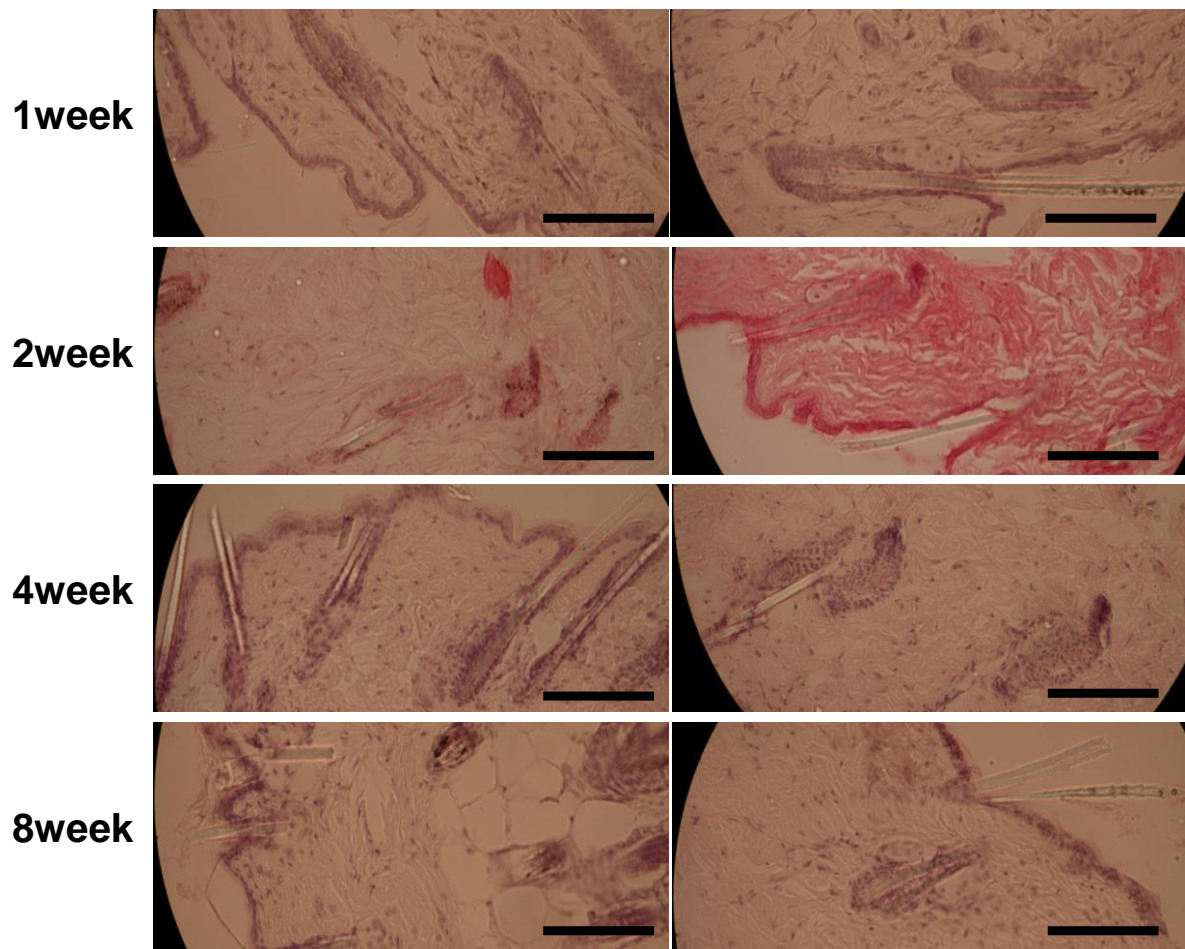

Supplementary Figure S11 **H&E stained tissue after long-term implantation of the porous PDMS in a mouse for 1, 2, 4 and 8 weeks.** Scale bar, 100  $\mu$ m.

Supplementary Tables

Supplementary Table S1. Elongation and thermal expansion

| Test              | Curing condition |        | Thickness ( $\mu\text{m}$ ) | No. of Samples |
|-------------------|------------------|--------|-----------------------------|----------------|
| Elongation        | 70°C for 6h      | Porous | 262.8 $\pm$ 13.89           | 25             |
|                   |                  | Bulk   | 248.3 $\pm$ 4.39            | 10             |
| Thermal expansion | 70°C for 6h      | Porous | 255.1 $\pm$ 4.91            | 10             |

Supplementary Table S2. Resistance

| Resistance | No. of Samples | Unit                         | Value             |
|------------|----------------|------------------------------|-------------------|
| Line       | N=20           | $R_0$ ( $\Omega/\text{cm}$ ) | 3.24 $\pm$ 0.56   |
| Sheet      | N=20           | $R_0$ ( $\Omega/\square$ )   | 1.87 $\pm$ 0.0.21 |

Supplementary Table S3. 8 LED array cycling reliability test

| Strain (%) | Strain rate (%/s) | No. of cycles  |
|------------|-------------------|----------------|
| 5          | 5%/s              | 2,000 ~ 40,000 |
| 10         | 5%/s              | ~ 1,000        |
| 20         | 5%/s              | ~ 300          |
| 30         | 5%/s              | ~ 100          |

Supplementary Table S4. ECG test

|              | SEX | Age | Period | Skin reaction |
|--------------|-----|-----|--------|---------------|
| Volunteer #1 | F   | 22  | 7 days | X             |
| Volunteer #2 | F   | 21  | 7 days | X             |
| Volunteer #3 | M   | 26  | 7 days | X             |
| Volunteer #4 | M   | 23  | 7 days | X             |
| Volunteer #5 | M   | 22  | 7 days | X             |

|               |   |             |        |   |
|---------------|---|-------------|--------|---|
| Volunteer #6  | M | 28          | 7 days | X |
| Volunteer #7  | M | 25          | 7 days | X |
| Volunteer #8  | M | 21          | 7 days | X |
| Volunteer #9  | M | 20          | 7 days | X |
| Volunteer #10 | M | 25          | 7 days | X |
| Mean          |   | 23.3 ± 2.45 |        |   |

Supplementary Table S5. Strain test

| Strain test | Strain rate | Figure       |
|-------------|-------------|--------------|
| 10 %        | 5%/s        | Fig. 2 a & b |
| 20%         | 5%/s        | Fig. 2 a & b |
| 30%         | 5%/s        | Fig. 2 a & b |
| 80%         | Manually    | Fig.2 c      |

Supplementary Table S6. Bending test

| Test         | Thickness (μm) | No. of Samples |
|--------------|----------------|----------------|
| Bending test | 236.5±4.8      | 8              |
|              | 349.8±15.31    | 8              |
|              | 412.18±14.72   | 8              |

Supplementary Table S7. Elongation and thermal expansion

| Test              | Curing condition |        | Thickness (μm) | No. of Samples |
|-------------------|------------------|--------|----------------|----------------|
| Elongation        | 70°C for 6h      | Porous | 262.8±13.89    | 25             |
|                   |                  | Bulk   | 248.3±4.39     | 10             |
| Thermal expansion | 70°C for 6h      | Porous | 255.1±4.91     | 10             |

Supplementary Table S8. Resistance comparison

| Ref.                      | Material            | $R_0$                                |
|---------------------------|---------------------|--------------------------------------|
| R. Carta <sup>31</sup>    | Cu foil meandering  | 0.94~2.23 ( $\Omega/cm$ )            |
| F. Axisa <sup>16</sup>    | Cu foil meandering  | 0.8~1.3 ( $\Omega/cm$ )              |
| S. Rosset <sup>36</sup>   | Au(sputtering),     | 17 ( $\Omega/\square$ )              |
|                           | Au (implant)        | 34~398 ( $\Omega/\square$ )          |
| L. Hu <sup>37</sup>       | SWNT                | $\leq 1.0$ ( $\Omega/\square$ )      |
| S. Lacour <sup>38</sup>   | Au (wavy line)      | 35~320 ( $\Omega/cm$ )               |
| M. Urdaneta <sup>25</sup> | Pt salt mixture     | 2.2( $\Omega/\square$ )              |
| Our study                 | Ti-Au (evaporation) | 3.24 $\pm$ 0.56 ( $\Omega/cm$ )      |
|                           |                     | 1.87 $\pm$ 0.21 ( $\Omega/\square$ ) |
